# Supplementary material
Source: publisher site journal article supplement (https://www.dovepress.com/article/445557)
Supplement: Supplementary file 1 [file get_supplementary_file.php]

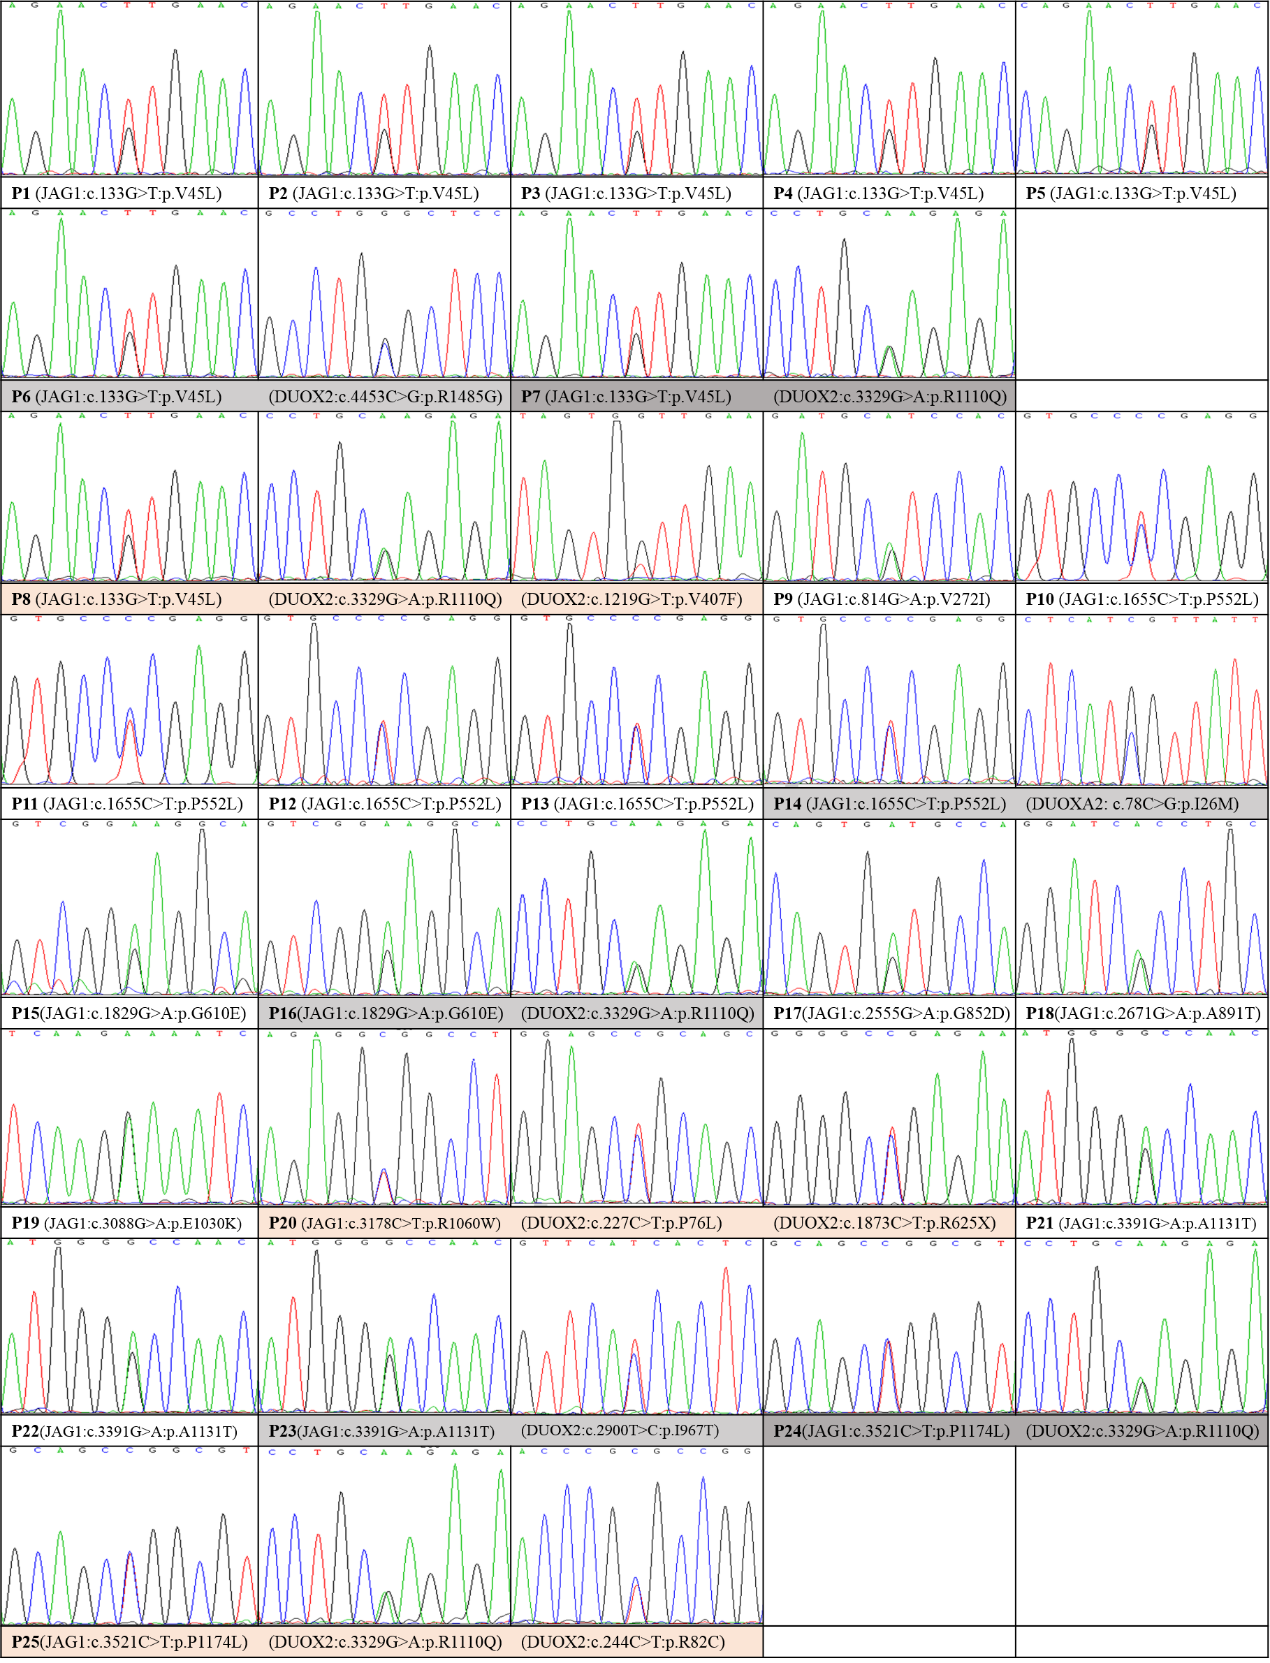


Supplementary figure 1 Sequence maps of mutations in patients

P1-P25 were patients carried *JAG1* variants. For these carriers, we performed further genetic analysis targeting 20 CH related genes and then identified that 1 with *DUOXA2* monoallelic variant, 5 with *DUOX2* monoallelic variant, and 3 with *DUOX2* biallelic variants. The variants carried by these patients were as follows: P1, P2, P3, P4, P5 carried *JAG1*:c.133G>T:p.V45L; P6 carried *JAG1*:c.133G>T:p.V45L, *DUOX2*:c.4453C>G:p.R1485G; P7 carried *JAG1*:c.133 G>T:p.V45L, *DUOX2*:c.3329G>A:p.R1110Q; P8 carried *JAG1*:c.133G>T:p.V45L, *DUOX2*:c.3329G>A:p.R1110Q, *DUOX2*:c.1219G>T:p.V407F; P9 carried *JAG1*:c.814G>A:p.V272I; P10, P11, P12, P13 carried *JAG1*:c.1655C>T:p.P552L; P14 carried *JAG1*:c.1655C>T:p.P552L, *DUOXA2*: c.78C>G:p.I26M; P15 carried *JAG1*:c.1829G>A:p.G610E; P16 carried *JAG1*:c.1829G>A:p.G610E, *DUOX2*:c.3329G>A:p.R1110Q; P17 carried *JAG1*:c.2555G>A:p.G852D; P18 carried *JAG1*:c.2671G>A:p.A891T; P19 carried *JAG1*:c.3088G>A:p.E1030K; P20 carried *JAG1*:c.3178C>T:p.R1060W, DUOX2:c.227C>T:p.P76L, *DUOX2*:c.1873C>T:p.R625X; P21,P22 carried *JAG1*:c.3391G>A:p.A1131T; P23 carried *JAG1*:c.3391G>A:p.A1131T, *DUOX2*:c.2900T>C:p.I967T; P24 carried *JAG1*:c.3521C>T:p.P1174L, *DUOX2*:c.3329G>A:p.R1110Q; P25 carried *JAG1*:c.3521C>T:p.P1174L, *DUOX2*:c.3329G>A:p.R1110Q, *DUOX2*:c.244C>T:p.R82C.

Supplementary table 1 Summary of the potential pathological variants detected in the present study

| **Gene** | **Nucleotide change** | **Amino acid**  **change** | **Location**  **(domain)** | **avsnp150** | **Minor allele frequencies** | | | **Statuts** | **SIFT** | **Poly-**  **phen 2** | **Mutation Taster** | **CADD-Phred** | **ACMG**  **classification** |
| --- | --- | --- | --- | --- | --- | --- | --- | --- | --- | --- | --- | --- | --- |
| GnomAD-ALL | ExAC-  ALL | 1000g-ALL | (score/prediction) | | |
| *JAG1* | c.133G>T | p.V45L | E2 | rs183974372 | 0.0006 | 0.0006 | 0.0022 | ReportedP | 0.227/T | 0.007/B | 0.947/D | 22.4 | LP |
| *JAG1* | c.814G>A | p.V272I | E6 | rs148990028 | 0.0002 | 0.0002 | 0.00060 | ReportedP | 0.108/T | 0.923/P | 1/D | 24.9 | VUS |
| *JAG1* | c.1655C>T | p.P552L | E13 | rs201785359 | 0.0002 | 0.0002 | 0.00060 | ReportedP | 0.001/D | 0.986/D | 1/D | 33 | VUS |
| *JAG1* | c.1829G>A | p.G610E | E14 | NA | 8.12E-06 | 0 | 0 | ReportedP | 0.066/T | 0.823/P | 1/D | 27.3 | VUS |
| *JAG1* | c.2555G>A | p.G852D | E21 | NA | 0 | 0 | 0 | Reportedp-o | 0/D | 1/D | 1/D | 34 | LP |
| *JAG1* | c.2671G>A | p.A891T | E22 | NA | 4.06E-06 | 0 | 0 | ReportedP | 0.561/T | 0/B | 0.608/D | 21.9 | VUS |
| *JAG1* | c.3088G>A | p.E1030K | E25 | NA | 0 | 0 | 0 | Reportedp-o | 0.276/T | 0.002/B | 1/D | 23.7 | LP |
| *JAG1* | c.3178C>T | p.R1060W | E25 | rs760992773 | 8.53E-05 | 8.24E-05 | 0 | ReportedP | 0.023/D | 0.96/D | 1/D | 34 | VUS |
| *JAG1* | c.3391G>A | p.A1131T | E26 | rs769242977 | 4.87E-05 | 7.41E-05 | 0 | ReportedP | 0.099/T | 0.483/P | 1/D | 21.1 | VUS |
| *JAG1* | c.3521C>T | p.P1174L | E26 | rs775363555 | 9.34E-05 | 3.30E-05 | 0 | ReportedP | 0.082/T | 0.713/P | 1/D | 27.7 | VUS |
| *DUOXA2* | c.78CC>G | p.I26M | E1 | NA | 0 | 0 | 0 | Reportedp-o | 0.038/D | 0.994/D | 0.646/D | 24.7 | LP |
| *DUOX2* | c.227C>T | p.P76L | E4 | rs767705906 | 2.47E-05 | 3.43E-05 | 0 | ReportedP | 0.003/D | 0.957/D | 1/D | 35 | LP |
| *DUOX2* | c.244C>T | p.R82C | E4 | NA | 0 | 0 | 0 | ReportedP | 0.002/D | 1/D | 1/D | 35 | VUS |
| *DUOX2* | c.1219G>T | p.V407F | E11 | NA | 0 | 0 | 0 | ReportedP | 0.003/D | 0.875/P | 1/D | 27.9 | VUS |
| *DUOX2* | c.1873C>T | p.R625X | E16 | rs770083296 | 2.44E-05 | 2.47E-05 | 0 | Reportedp | - |  | 1/A | 38 | P |
| *DUOX2* | c.2900T>C | p.I967T | E22 | rs765025859 | 4.07E-06 | 8.81E-06 | 0 | ReportedP-o | 0.005/D | 0.004/B | 1/D | 23.4 | VUS |
| *DUOX2* | c.3329G>A | p.R1110Q | E25 | rs368488511 | 0.0002 | 0.0002 | 0.00040 | ReportedP | 0.003/D | 0.994/D | 1/D | 35 | LP |
| *DUOX2* | c.4453C>G | p.R1485G | E33 | rs368004695 | 0 | 0 | 0 | Reportedp-o | 0.002/D | 0.997/D | 1/D | 33 | VUS |

Status: evaluated based on whether variants are reported in public databases or published literature;

ReportedP: variant was reported in patients with clinical phenotype; ReportedP-o: pathogenic variant which was first reported by our research team

P: Pathogenic; LP: Likely Pathogenic; VUS: Variants of Uncertain Significance
